# Supplementary material
Source: PubMed Central journal article supplement (PMC7159081)
Supplement: mmc1.pdf [file mmc1.pdf]

# THE LANCET

## **Supplementary webappendix**

This webappendix formed part of the original submission and has been peer reviewed. We post it as supplied by the authors.

Supplement to: Acuin CS, Khor GL, Liabsuetrakul T, et al. Maternal, neonatal, and child health in southeast Asia: towards greater regional collaboration. *Lancet* 2011; published online January 25. DOI:10.1016/S0140-6736(10)62049-1.

**Table 1: Data sources**

| <b>Data Source</b>                                                 | <b>Country Coverage</b>                   | <b>Indicators</b>                                                                                                                                              | <b>Estimation methods</b>                                                                                                                                                          | <b>Limitations</b>                                                                                                                                                                                    |
|--------------------------------------------------------------------|-------------------------------------------|----------------------------------------------------------------------------------------------------------------------------------------------------------------|------------------------------------------------------------------------------------------------------------------------------------------------------------------------------------|-------------------------------------------------------------------------------------------------------------------------------------------------------------------------------------------------------|
| DHS                                                                | Cambodia, Indonesia, Philippines, Vietnam | Time trends for neonatal, infant, under-five mortality, maternal mortality; intervention coverage (vaccination, IMCI, skilled birth attendance, delivery care) | Direct sisterhood method for maternal mortality estimates; direct method for estimation of child mortality rates; estimates of intervention coverage are weighted proportions      | Only 4/10 countries covered, time periods per country variable; direct sisterhood method may underestimate maternal deaths; birth transference may underestimate infant mortality                     |
| MICS                                                               | Laos, Myanmar, Thailand, Vietnam          | Estimation of infant, under-five mortality rates; intervention coverage (vaccination, IMCI, skilled birth attendance, delivery care)                           | Indirect estimation of infant and under-five mortality rates; estimates of intervention coverage are weighted proportions                                                          | Earlier rounds of MICS subject to Only 3/10 countries covered                                                                                                                                         |
| Inter-agency Group for Child Mortality Estimation (UNICEF and WHO) | All 10 countries                          | Standardized estimation of time trends in infant, under-five mortality rates, 1990-2009 for 196 countries                                                      | Linear spline regression for countries without high HIV/AIDS prevalence, Loess regression for countries with high HIV/AIDS prevalence; weights applied for country data sources    | Do not address potential mortality shocks other than HIV/AIDS epidemic; Loess forecasts of mortality decline may be conservative; vital registration available for 5/10 Southeast Asia countries      |
| Institute for Health Metrics and Evaluation; Rajaratnam et al.     | All 10 countries                          | Standardized estimation of time trends in neonatal, infant, under-five mortality rates for 187 countries from 1970-2009                                        | Gaussian process regression of under-five mortality accounting for non-sampling error; infant and neonatal mortality modeled from under-five mortality using multilevel regression | Yields lower estimates of mortality than other methods; similar modeling approach for countries with and without high HIV prevalence; vital registration available for 5/10 Southeast Asian countries |
| Maternal Mortality Estimation Inter-Agency Group (WHO)             | All 10 countries                          | Standardized estimation of time trends in maternal mortality ratio 1990-2008 for 172 countries                                                                 | Direct estimation from civil registration sources; multilevel regression model for other types of data sources                                                                     | Underreporting/misclassification of maternal deaths in household survey sources; did not include subnational data sources                                                                             |
| Institute for Health Metrics and Evaluation; Hogan et al.          | All 10 countries                          | Standardised estimation of time trends in maternal mortality ratio for 181 countries, 1980-2008                                                                | Two-step spatio-temporal regression                                                                                                                                                | Underreporting/misclassification of maternal deaths in household survey sources; did not extract incidental pregnancy-related deaths; impact of HIV epidemic                                          |

|        |                  |                                                             |                                                                                                                                                                                                                                                                                                                                               |                                                                                                                                   |
|--------|------------------|-------------------------------------------------------------|-----------------------------------------------------------------------------------------------------------------------------------------------------------------------------------------------------------------------------------------------------------------------------------------------------------------------------------------------|-----------------------------------------------------------------------------------------------------------------------------------|
|        |                  |                                                             |                                                                                                                                                                                                                                                                                                                                               | modeled directly; vital registration available for 5/10 Southeast Asian countries; Myanmar and Vietnam no national data available |
| CHERG: | All 10 countries | Cause of death estimation for neonatal, infant, under-fives | Direct estimation with ICD-10 codes for complete vital registration data; for countries without complete vital registration, separate multicause multinomial regression models for countries with low and high child mortality using verbal autopsy sources; separation estimation of neonatal tetanus, malaria, measles, pertussis, HIV/AIDS | Highest mortality countries of Southeast Asia do not have vital registration, estimates are modeled                               |



|                                                             |  |  |  |  |  |  |  |     |     |  |  |  |  |  |  |  |  |  |  |  |
|-------------------------------------------------------------|--|--|--|--|--|--|--|-----|-----|--|--|--|--|--|--|--|--|--|--|--|
| Clean practices and immediate essential newborn care (home) |  |  |  |  |  |  |  | 0.1 | 0.5 |  |  |  |  |  |  |  |  |  |  |  |
|-------------------------------------------------------------|--|--|--|--|--|--|--|-----|-----|--|--|--|--|--|--|--|--|--|--|--|

Data from the Institute for International Programs<sup>1</sup> and UNICEF.<sup>2</sup>

|                                                                      | Diarrhoeal diseases | AF | Tetanus | AF | Sepsis/<br>Pneumonia | AF | Preterm birth complications | AF | Birth asphyxia | AF | Congenital abnormalities | AF | Other neonatal deaths | AF |
|----------------------------------------------------------------------|---------------------|----|---------|----|----------------------|----|-----------------------------|----|----------------|----|--------------------------|----|-----------------------|----|
| <b>Neonatal Effect estimates</b>                                     |                     |    |         |    |                      |    |                             |    |                |    |                          |    |                       |    |
| <b>Periconceptual</b>                                                |                     |    |         |    |                      |    |                             |    |                |    |                          |    |                       |    |
| Folic acid supplementation or fortification                          |                     |    |         |    |                      |    |                             |    |                |    | 0.35                     | 1  |                       |    |
| <b>Pregnancy</b>                                                     |                     |    |         |    |                      |    |                             |    |                |    |                          |    |                       |    |
| Syphilis detection and treatment                                     |                     |    |         |    | 0.025                | 1  |                             |    |                |    |                          |    |                       |    |
| Tetanus toxoid                                                       |                     |    | 0.94    | 1  |                      |    |                             |    |                |    |                          |    |                       |    |
| <b>Childbirth</b>                                                    |                     |    |         |    |                      |    |                             |    |                |    |                          |    |                       |    |
| Antibiotics for pPRoM                                                |                     |    |         |    | 0.08                 | 1  | 0.12                        | 1  |                |    |                          |    |                       |    |
| Essential care for all women and immediate essential newborn care    |                     |    | 0.36    | 1  | 0.25                 | 1  | 0.1                         | 1  | 0.25           | 1  |                          |    |                       |    |
| Basic emergency obstetric care (clinic)                              |                     |    | 0.36    | 1  | 0.25                 | 1  | 0.1                         | 1  | 0.4            | 1  |                          |    |                       |    |
| Comprehensive emergency obstetric care                               |                     |    | 0.36    | 1  | 0.25                 | 1  | 0.1                         | 1  | 0.8            | 1  |                          |    |                       |    |
| Clean practices and immediate essential newborn care (home)          |                     |    | 0.3     | 1  | 0.2                  | 1  |                             |    |                |    |                          |    |                       |    |
| Neonatal resuscitation (institutional)                               |                     |    |         |    |                      |    | 0.1                         | 1  | 0.3            | 1  |                          |    |                       |    |
| Neonatal resuscitation (home)                                        |                     |    |         |    |                      |    | 0.05                        | 1  | 0.2            | 1  |                          |    |                       |    |
| Antenatal corticosteroids for preterm labor                          |                     |    |         |    |                      |    | 0.53                        | 1  |                |    |                          |    |                       |    |
| <b>Preventive after birth</b>                                        |                     |    |         |    |                      |    |                             |    |                |    |                          |    |                       |    |
| Preventive postnatal care (healthy practices and illness detection)  |                     |    |         |    | 0.31                 | 1  | 0.35                        | 1  |                |    |                          |    |                       |    |
| <b>Curative after birth</b>                                          |                     |    |         |    |                      |    |                             |    |                |    |                          |    |                       |    |
| Oral antibiotics: case management of severe neonatal infection       |                     |    |         |    | 0.42                 | 1  |                             |    |                |    |                          |    |                       |    |
| Injectable antibiotics: case management of severe neonatal infection |                     |    |         |    | 0.68                 | 1  |                             |    |                |    |                          |    |                       |    |

|                                                                    |      |   |  |  |  |      |   |      |   |      |   |  |  |     |   |
|--------------------------------------------------------------------|------|---|--|--|--|------|---|------|---|------|---|--|--|-----|---|
| Full supportive care: case management of severe neonatal infection |      |   |  |  |  | 0.83 | 1 | 0.28 | 1 | 0.05 | 1 |  |  | 0.1 | 1 |
| ORS                                                                | 0.93 | 1 |  |  |  |      |   |      |   |      |   |  |  |     |   |
| Kangaroo mother care                                               |      |   |  |  |  |      |   | 0.51 | 1 |      |   |  |  |     |   |

| <b>Post Neonatal Effect Estimates</b>                     | <b>Diarrheal diseases</b> | <b>AF</b> | <b>Pertussis</b> | <b>AF</b> | <b>Measles</b> | <b>AF</b> | <b>Meningitis</b> | <b>A F</b> | <b>Malaria</b> | <b>A F</b> | <b>Pneumonia</b> | <b>A F</b> | <b>Other infections*</b> | <b>A F</b> | <b>Non-communicable diseases</b> | <b>A F</b> | <b>Injuries</b> | <b>A F</b> |
|-----------------------------------------------------------|---------------------------|-----------|------------------|-----------|----------------|-----------|-------------------|------------|----------------|------------|------------------|------------|--------------------------|------------|----------------------------------|------------|-----------------|------------|
| <b>Preventive after birth</b>                             |                           |           |                  |           |                |           |                   |            |                |            |                  |            |                          |            |                                  |            |                 |            |
| Use of improved water source within 30 minutes            | 0.17                      | 1         |                  |           |                |           |                   |            |                |            |                  |            |                          |            |                                  |            |                 |            |
| Use of water connection in the home                       | 0.69                      | 1         |                  |           |                |           |                   |            |                |            |                  |            |                          |            |                                  |            |                 |            |
| Improved excreta disposal (latrine/toilet)                | 0.36                      | 1         |                  |           |                |           |                   |            |                |            |                  |            |                          |            |                                  |            |                 |            |
| Hand washing with soap                                    | 0.48                      | 1         |                  |           |                |           |                   |            |                |            |                  |            |                          |            |                                  |            |                 |            |
| Hygienic disposal of children's stools                    | 0.2                       | 1         |                  |           |                |           |                   |            |                |            |                  |            |                          |            |                                  |            |                 |            |
| Insecticide treated materials or indoor residual spraying |                           |           |                  |           |                |           |                   |            | 0.55           | 1          |                  |            |                          |            |                                  |            |                 |            |
| Vitamin A for prevention                                  | 0.32                      | 1         |                  |           |                |           |                   |            |                |            |                  |            |                          |            |                                  |            |                 |            |
| Zinc for prevention                                       | 0.15                      | 1         |                  |           |                |           |                   |            |                |            | 0.15             | 1          |                          |            |                                  |            |                 |            |
| <b>Vaccines</b>                                           |                           |           |                  |           |                |           |                   |            |                |            |                  |            |                          |            |                                  |            |                 |            |
| Rotavirus vaccine                                         | 0.74                      | 0.4       |                  |           |                |           |                   |            |                |            |                  |            |                          |            |                                  |            |                 |            |
| Hib vaccine                                               |                           |           |                  |           |                |           | 0.204             | 1          |                |            | 0.204            | 1          |                          |            |                                  |            |                 |            |
| Pneumococcal vaccine                                      |                           |           |                  |           |                |           | 0.27              | 1          |                |            | 0.27             | 1          |                          |            |                                  |            |                 |            |
| Measles vaccine                                           |                           |           |                  |           | 0.85           | 1         |                   |            |                |            |                  |            |                          |            |                                  |            |                 |            |
| DPT vaccination                                           |                           |           | 0.7              | 1         |                |           |                   |            |                |            |                  |            |                          |            |                                  |            |                 |            |
| <b>Curative after birth</b>                               |                           |           |                  |           |                |           |                   |            |                |            |                  |            |                          |            |                                  |            |                 |            |
| ORS                                                       | 0.93                      | 1         |                  |           |                |           |                   |            |                |            |                  |            |                          |            |                                  |            |                 |            |
| Antibiotics for dysentery                                 | 0.99                      | 0.1       |                  |           |                |           |                   |            |                |            |                  |            |                          |            |                                  |            |                 |            |
| Case management of pneumonia (oral antibiotics)           |                           |           |                  |           |                |           |                   |            |                |            | 0.7              | 1          |                          |            |                                  |            |                 |            |



|                                 |      |   |  |  |      |   |  |  |      |   |  |  |  |  |  |  |  |
|---------------------------------|------|---|--|--|------|---|--|--|------|---|--|--|--|--|--|--|--|
| Antimalarials                   |      |   |  |  |      |   |  |  | 0.84 | 1 |  |  |  |  |  |  |  |
| Vitamin A for measles treatment |      |   |  |  | 0.62 | 1 |  |  |      |   |  |  |  |  |  |  |  |
| Zinc for treatment              | 0.23 | 1 |  |  |      |   |  |  |      |   |  |  |  |  |  |  |  |

**Webfigure 1: Mortality reductions with GNI per capita**

Mortality data from UN MDG Reports;<sup>3,4</sup> GNI per capita from the World Bank.<sup>5</sup>

A. Scatterplot of maternal mortality against GNI per capita in 1990 and 2008

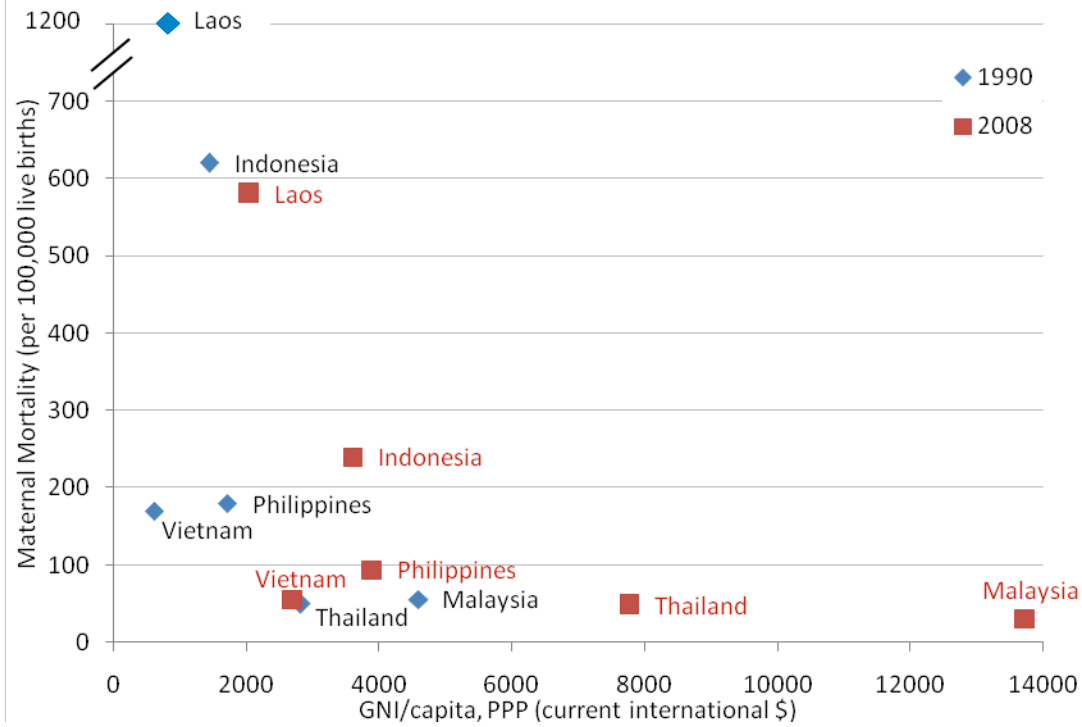

B. Scatterplot of infant mortality against GNI per capita in 1990 and 2008

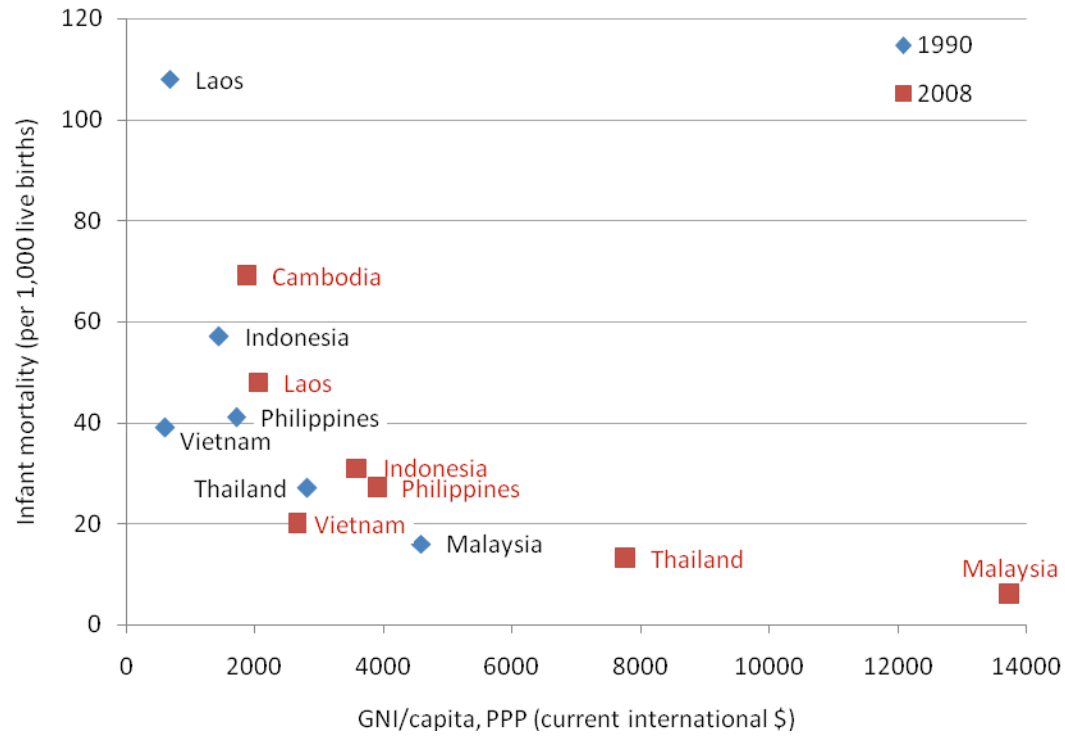

C. Scatterplot of under-5 mortality against GNI per capita in 1990 and 2008

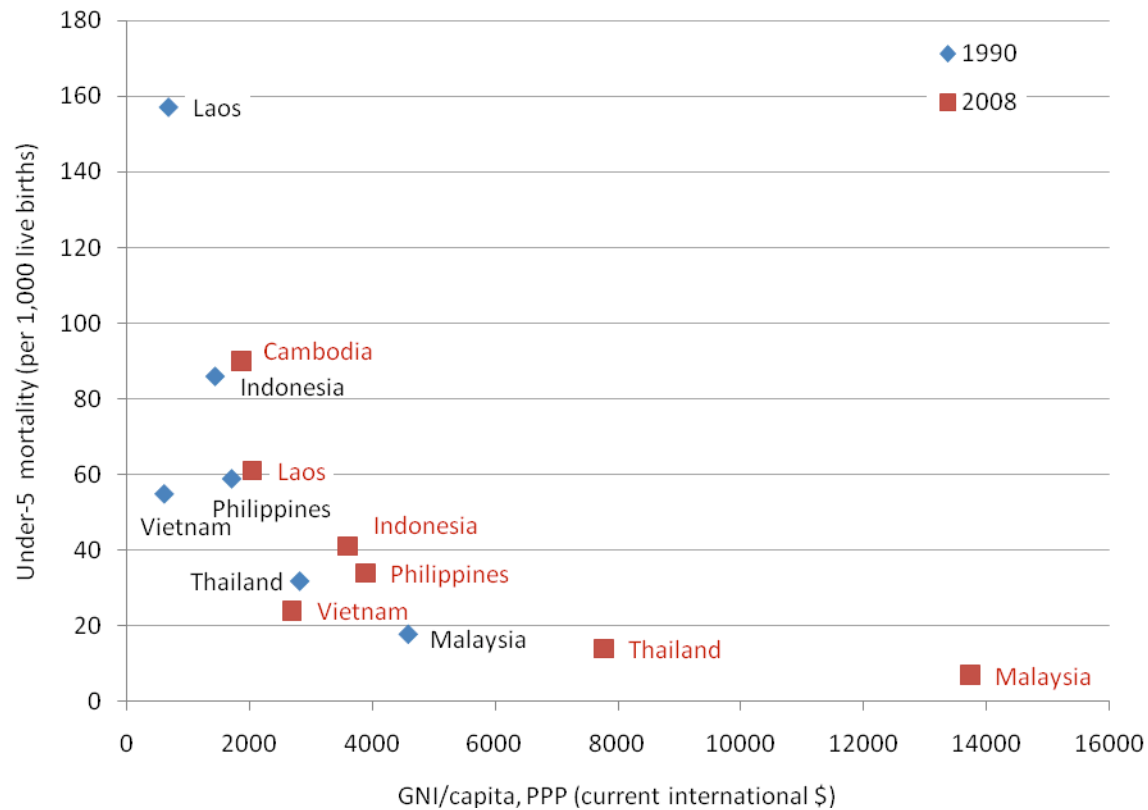

**Webfigure 2: Neonatal and postneonatal mortality rate reductions (1990–2008)**

Data from Rajaratnam et al.<sup>6</sup>

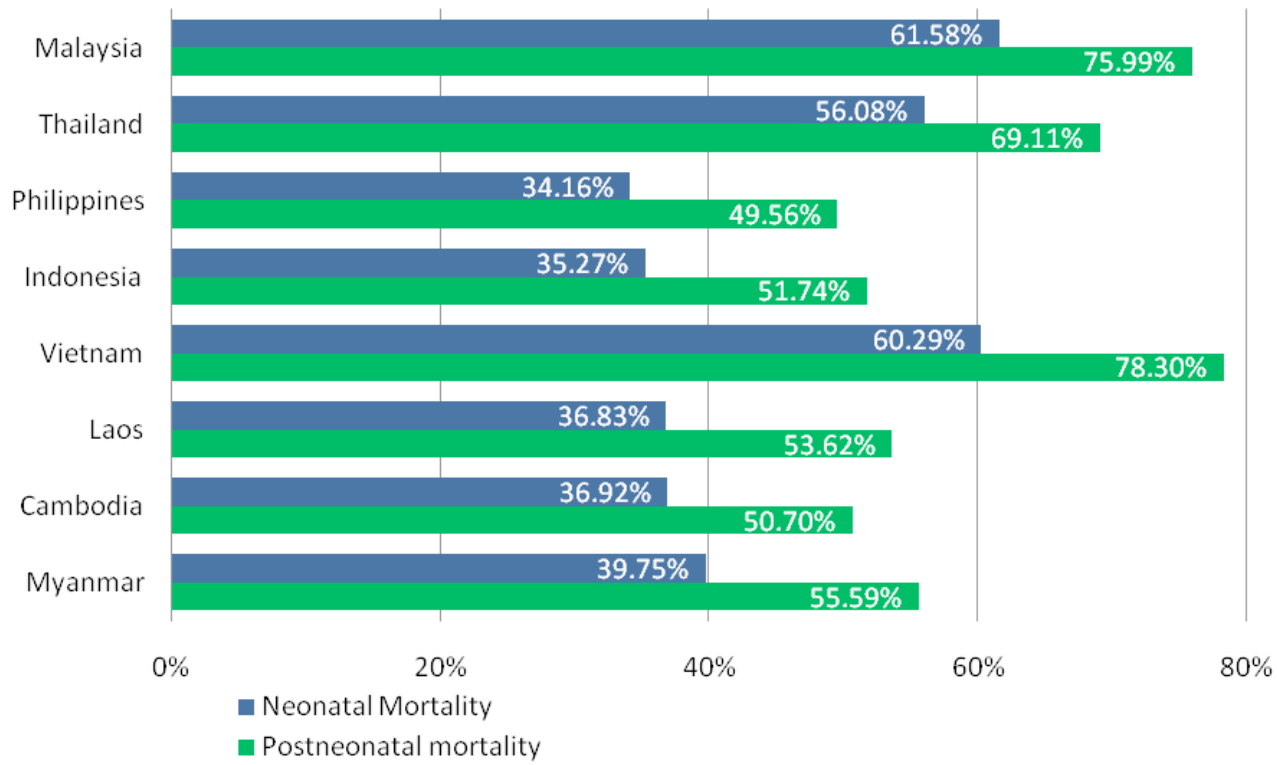

**Webfigure 3: Inequities in MNCH intervention coverage (%) in selected southeast Asia countries**  
 Data from Gwatkin D et al<sup>7-10</sup> and UNICEF.<sup>11</sup> \*Antenatal refers to antenatal care visits.

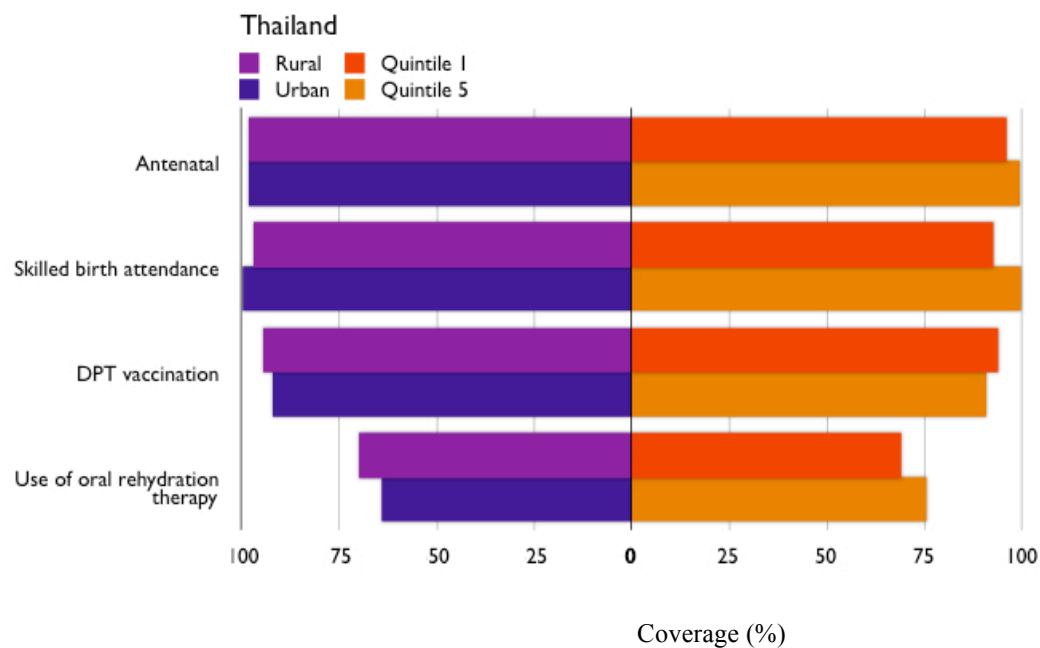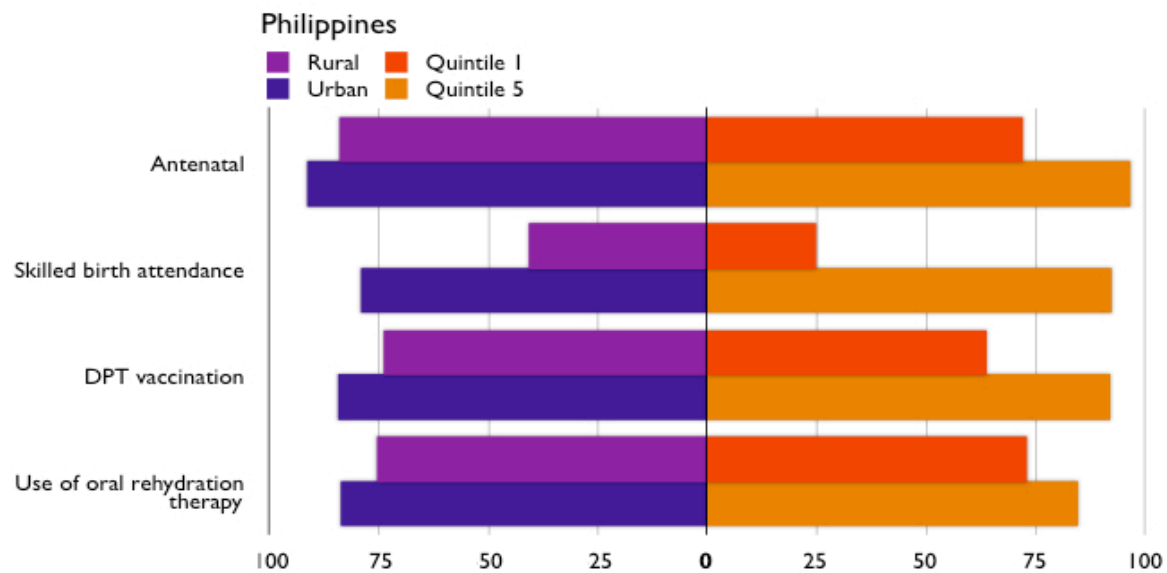

### Indonesia

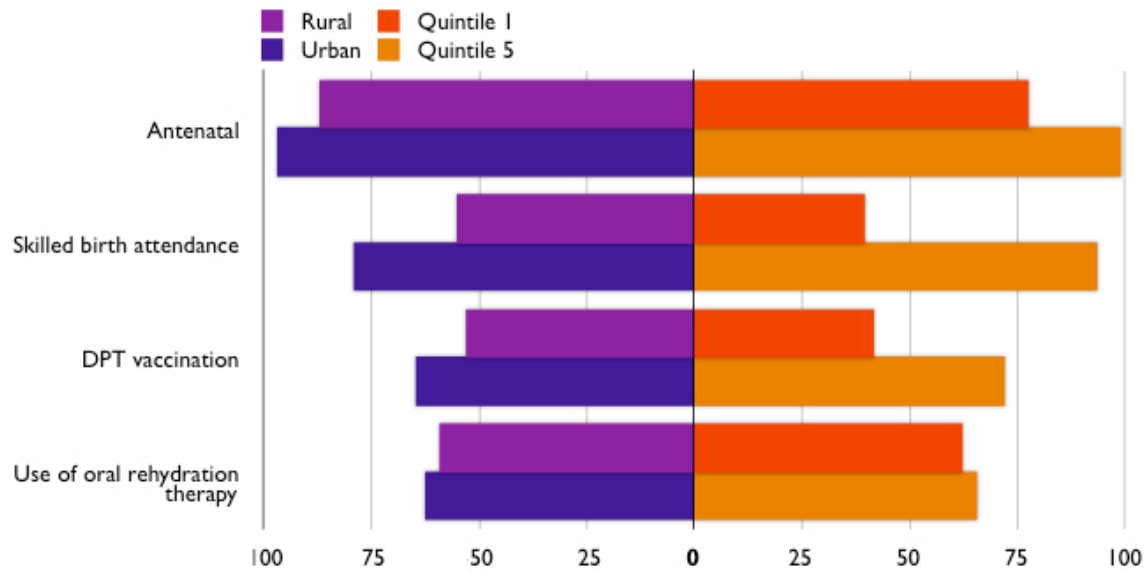

### Vietnam

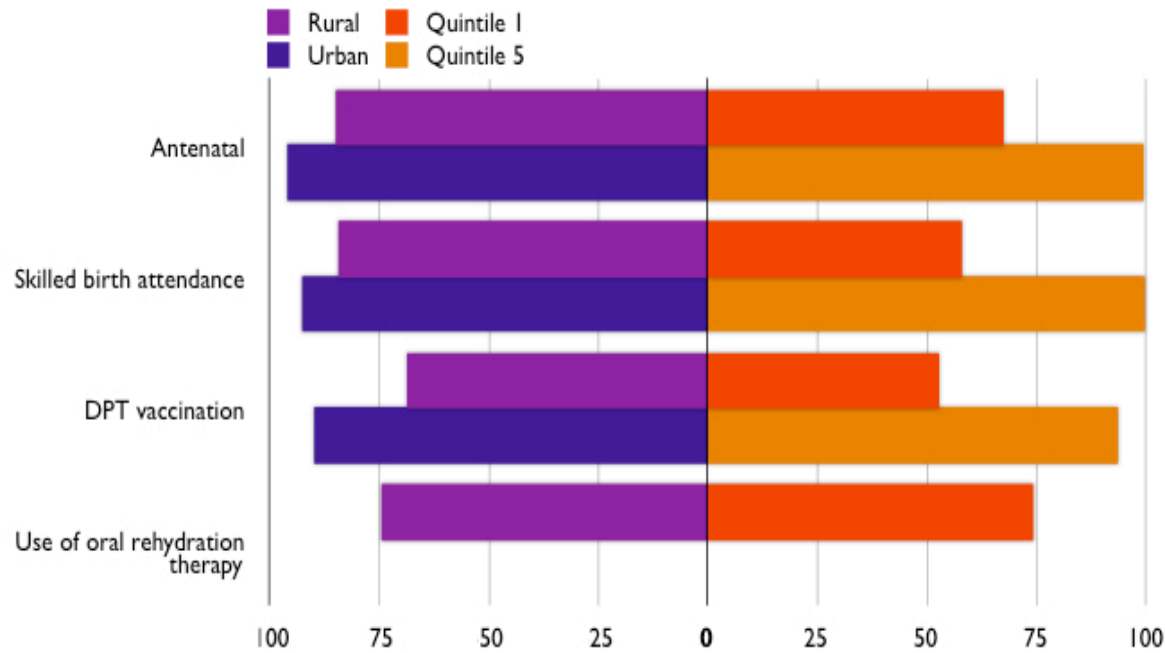

### Laos

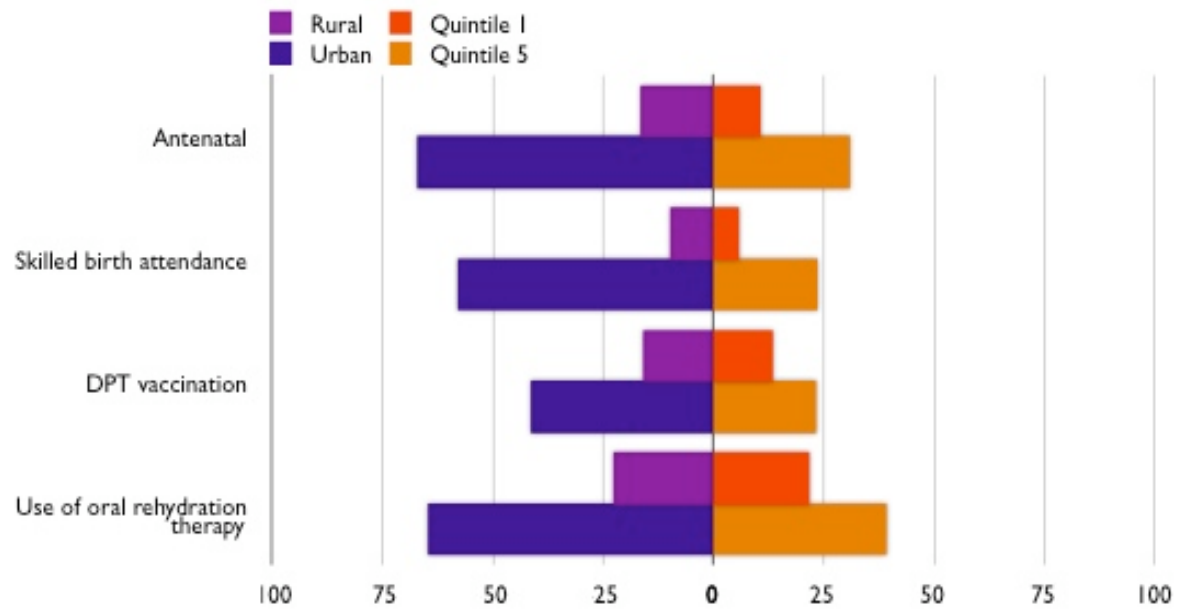

### Cambodia

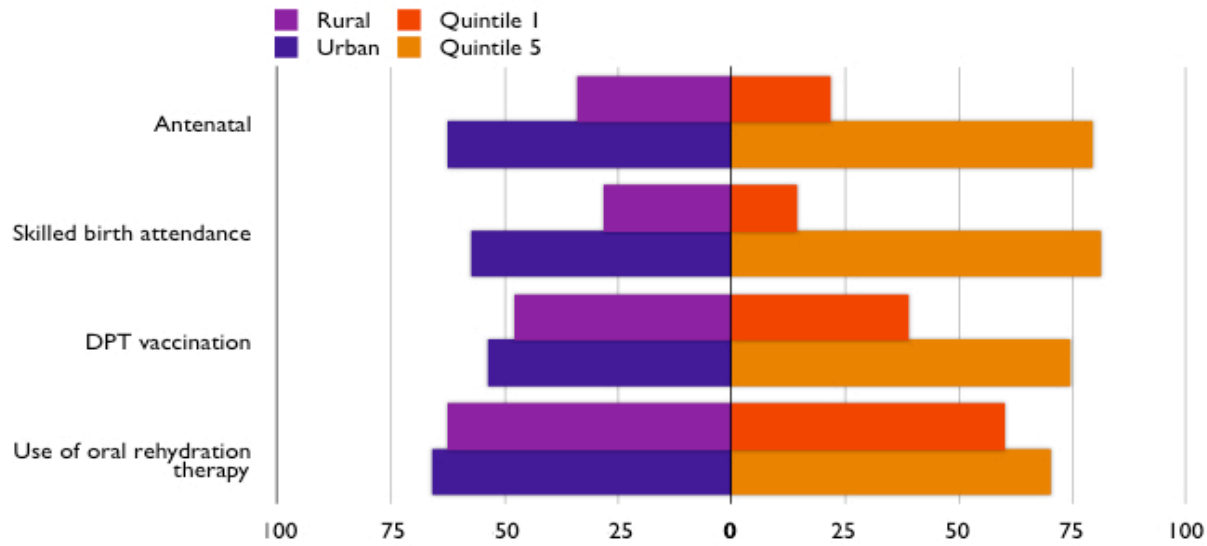



**Webfigure 4: Trends in maternal mortality and maternal, neonatal, and child health programmes in Thailand, by GDP (1960– 2008)**

Data from Thailand Ministry of Health. MMR=maternal mortality rate. GDP=gross domestic product.

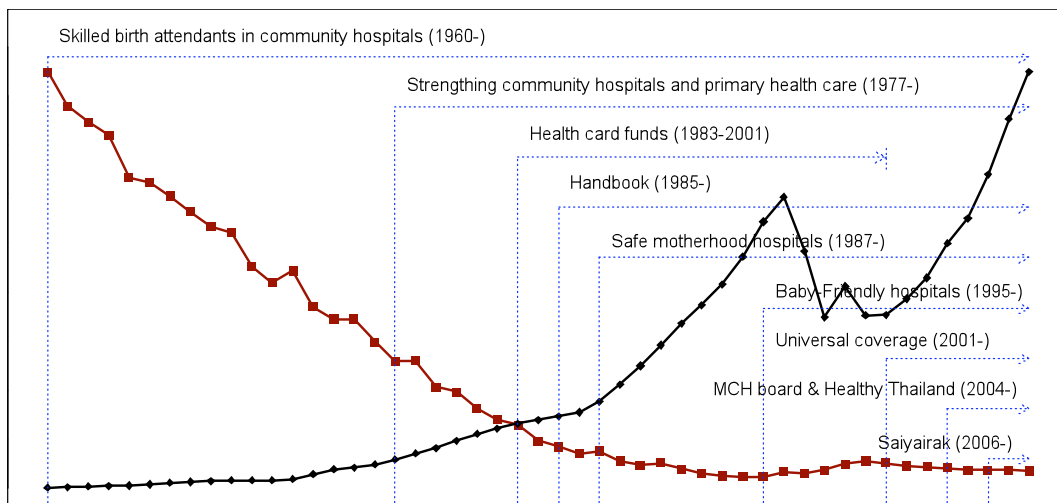

Webfigure 5: Trends in maternal mortality and safe motherhood programmes in Indonesia, by GDP (1960–2008)

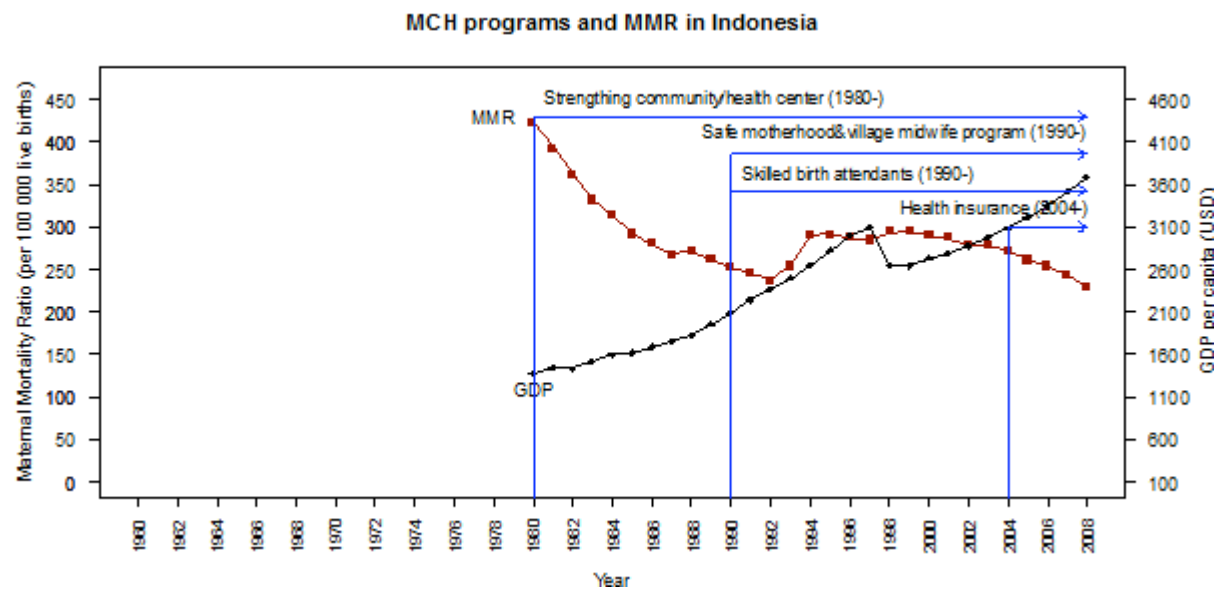

Data from Indonesian Ministry of Health.

**Webfigure 6: Neonatal mortality reductions in Thailand (red) and Indonesia (blue) by GDP (1960–2008)**

Data from Thailand and Indonesian Ministries of Health. NMR=neonatal mortality rate. GDP=gross domestic product.

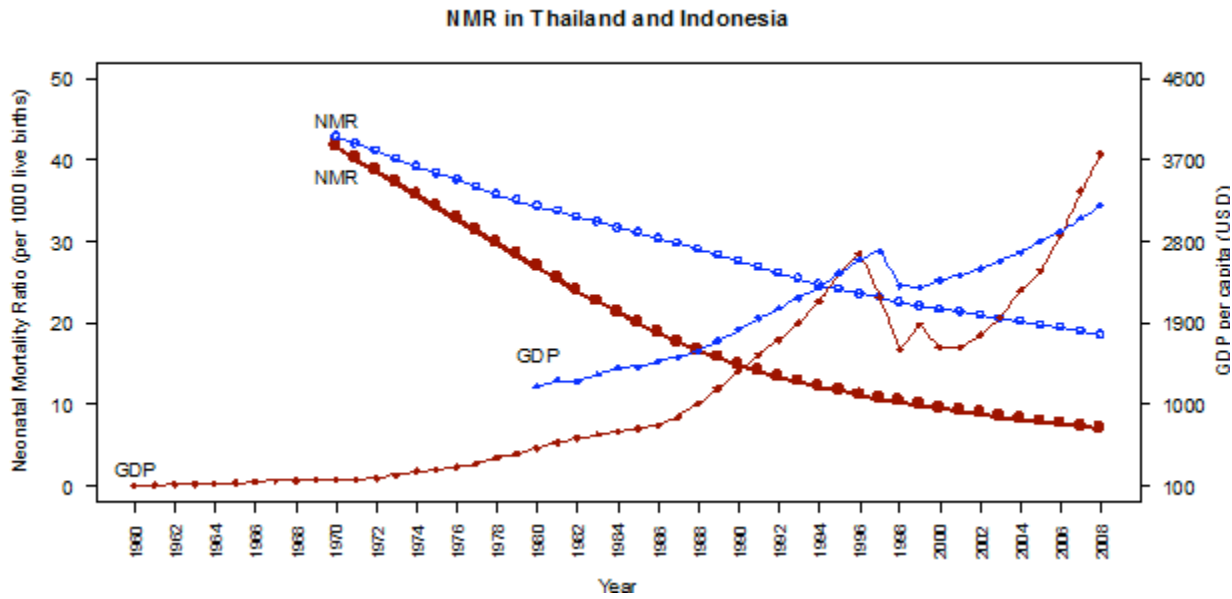

## References

- 1 Institute for International Programs. LiST: The Lives Saved Tool—an evidence-based tool for estimating intervention impact. <http://www.jhsph.edu/dept/ih/IIP/list/index.html> (accessed Oct 29, 2010).
- 2 Plosky WD, Stover J, Winfrey B. The Lives Saved Tool. A computer program for making child and maternal survival projections. UNICEF. December, 2009.
- 3 WHO. Trends in maternal mortality: 1990–2008. Geneva: World Health Organization, 2010.
- 4 UNICEF. Levels and trends in child mortality, Report 2010. Estimates developed by the UN Inter-agency Group for Child Mortality Estimation. United Nations Children’s Fund, 2010 [http://www.unicef.gr/pdfs/UNICEF\\_Levels\\_and\\_Trends\\_in\\_Child\\_mortality.pdf](http://www.unicef.gr/pdfs/UNICEF_Levels_and_Trends_in_Child_mortality.pdf) (accessed Nov 22, 2010).
- 5 World Bank. World Development Indicators database. <http://siteresources.worldbank.org/DATASTATISTICS/Resources/GNIPC.pdf> (accessed Sept 27, 2010).
- 6 Rajaratnam J, Marcus J, Flaxman A, et al. Neonatal, postnatal, childhood, and under-5-mortality for 187 countries, 1970–2010: a systematic analysis of progress towards Millennium Development Goal 4. *Lancet* 2010; **375**:1988–2007.
- 7 Gwatkin D, Rutstein S, Johnson K, Suliman E, Wagstaff A, Amouzou A. Socio- economic differences in health, nutrition, and population in Cambodia. Washington, DC: The World Bank, 2007.
- 8 Gwatkin D, Rutstein S, Johnson K, Suliman E, Wagstaff A, Amouzou A. Socio- economic differences in health, nutrition, and population in Indonesia. Washington, DC: The World Bank, 2007.
- 9 Gwatkin D, Rutstein S, Johnson K, Suliman E, Wagstaff A, Amouzou A. Socio- economic differences in health, nutrition, and population in the Philippines. Washington, DC: The World Bank, 2007.
- 10 Gwatkin D, Rutstein S, Johnson K, Suliman E, Wagstaff A, Amouzou A. Socio- economic differences in health, nutrition, and population in Vietnam. Washington, DC: The World Bank, 2007.
- 11 UNICEF. Multiple Indicator Cluster Surveys. UNICEF. <http://www.childinfo.org/mics.html> (accessed July 4, 2010).
